# Supplementary material for: All or nothing? Partial business shutdowns and COVID-19 fatality growth
Source: PubMed Central journal article supplement (PMC8827474; doi:10.1371/journal.pone.0262925), 2022-02-09
Supplement: pone.0262925.s002.pdf [file pone.0262925.s002.pdf]

**S1 Table. Summary Statistics.**

| <b>Variable</b>          | <b>Total</b>      | <b>Baseline Data</b> | <b>Low Population</b> | <b>Neighbor 100</b> | <b>Neighbor 200</b> |
|--------------------------|-------------------|----------------------|-----------------------|---------------------|---------------------|
| Bars Closed, Rest Closed | 24,417<br>10.58%  | 2,349<br>3.54%       | 1,899<br>3.23%        | 1,263<br>3.39%      | 618<br>2.65%        |
| Bars Closed, Rest Out    | 5,852<br>2.54%    | 1,929<br>2.91%       | 1,610<br>2.74%        | 1,030<br>2.76%      | 186<br>0.80%        |
| Bars Out, Rest Out       | 3,346<br>1.45%    | 1,658<br>2.50%       | 1,436<br>2.44%        | 886<br>2.38%        | 690<br>2.96%        |
| Bars Closed, Rest 25%    | 3,097<br>1.34%    | 1,188<br>1.79%       | 979<br>1.66%          | 512<br>1.37%        | 159<br>0.68%        |
| Bars Out, Rest 25%       | 431<br>0.19%      | 264<br>0.40%         | 110<br>0.19%          | 135<br>0.36%        | 60<br>0.26%         |
| Bars 25%, Rest 25%       | 2,495<br>1.08%    | 1,238<br>1.87%       | 953<br>1.62%          | 609<br>1.63%        | 324<br>1.39%        |
| Bars Closed, Rest 50%    | 14,084<br>6.10%   | 7,514<br>11.33%      | 6,531<br>11.10%       | 4,270<br>11.45%     | 1,949<br>8.35%      |
| Bars Out, Rest 50%       | 2,694<br>1.17%    | 771<br>1.16%         | 676<br>1.15%          | 480<br>1.29%        | 304<br>1.30%        |
| Bars 25%, Rest 50%       | 5,395<br>2.34%    | 2,654<br>4.00%       | 2,478<br>4.21%        | 1,530<br>4.10%      | 1,063<br>4.56%      |
| Bars 50%, Rest 50%       | 41,451<br>17.96%  | 16,259<br>24.52%     | 14,230<br>24.18%      | 8,995<br>24.12%     | 6,313<br>27.05%     |
| Bars Closed, Rest >50%   | 6,489<br>2.81%    | 2,553<br>3.85%       | 2,409<br>4.09%        | 1,181<br>3.17%      | 421<br>1.80%        |
| Bars Out, Rest >50%      | 48<br>0.02%       | 8<br>0.01%           | 8<br>0.01%            | 4<br>0.01%          | 4<br>0.02%          |
| Bars 25%, Rest >50%      | 473<br>0.20%      | 346<br>0.52%         | 305<br>0.52%          | 262<br>0.70%        | 163<br>0.70%        |
| Bars 50%, Rest >50%      | 20,280<br>8.79%   | 8,195<br>12.36%      | 7,799<br>13.25%       | 5,016<br>13.45%     | 3,744<br>16.04%     |
| Bars >50%, Rest >50%     | 96,407<br>41.77%  | 18,866<br>28.45%     | 17,139<br>29.12%      | 10,858<br>29.11%    | 7,198<br>30.85%     |
| Gyms Closed              | 31,468<br>13.63%  | 6,327<br>9.54%       | 5,287<br>8.98%        | 3,595<br>9.64%      | 1,860<br>7.97%      |
| Gyms 25%                 | 24,582<br>10.65%  | 8,352<br>12.59%      | 6,862<br>11.66%       | 4,613<br>12.37%     | 1,800<br>7.71%      |
| Gyms 50%                 | 52,147<br>22.59%  | 24,394<br>36.78%     | 21,351<br>36.27%      | 13,162<br>35.29%    | 9,196<br>39.41%     |
| Gyms >50%                | 120,856<br>52.36% | 27,388<br>41.30%     | 25,491<br>43.31%      | 16,011<br>42.93%    | 10,518<br>45.07%    |

|               |                   |                  |                  |                  |                  |
|---------------|-------------------|------------------|------------------|------------------|------------------|
| Spas Closed   | 26,738<br>11.58%  | 3,490<br>5.26%   | 2,840<br>4.83%   | 1,681<br>4.51%   | 878<br>3.76%     |
| Spas 25%      | 14,891<br>6.45%   | 5,494<br>8.28%   | 4,494<br>7.64%   | 2,718<br>7.29%   | 1,137<br>4.87%   |
| Spas 50%      | 61,428<br>26.61%  | 28,567<br>43.07% | 25,199<br>42.81% | 15,700<br>42.09% | 8,811<br>37.76%  |
| Spas >50%     | 126,102<br>54.63% | 28,835<br>43.48% | 26,388<br>44.83% | 17,237<br>46.21% | 12,521<br>53.66% |
| Retail Closed | 17,146<br>7.43%   | 1,679<br>2.53%   | 1,225<br>2.08%   | 746<br>2.00%     | 169<br>0.72%     |
| Retail 25%    | 28,802<br>12.48%  | 10,032<br>15.13% | 8,611<br>14.63%  | 5,716<br>15.33%  | 2,635<br>11.29%  |
| Retail 50%    | 71,153<br>30.83%  | 30,871<br>46.55% | 27,450<br>46.64% | 17,923<br>48.05% | 12,303<br>52.72% |
| Retail >50%   | 111,976<br>48.51% | 23,882<br>36.01% | 21,706<br>36.88% | 12,995<br>34.84% | 8,268<br>35.43%  |
| Movies Closed | 40,659<br>17.62%  | 10,986<br>16.56% | 9,290<br>15.78%  | 6,096<br>16.34%  | 3,119<br>13.37%  |
| Movies 25%    | 35,555<br>15.40%  | 10,896<br>16.43% | 9,275<br>15.76%  | 5,792<br>15.53%  | 3,381<br>14.49%  |
| Movies 50%    | 77,775<br>33.70%  | 32,848<br>49.53% | 29,778<br>50.59% | 19,485<br>52.24% | 13,764<br>58.98% |
| Movies >50%   | 75,327<br>32.64%  | 11,823<br>17.83% | 10,730<br>18.23% | 6,056<br>16.24%  | 3,168<br>13.58%  |
| N             | 230,812           | 66,321           | 58,860           | 37,298           | 23,336           |

This table shows the number of observations for the restrictions on restaurants, bars, gyms, spas, retail establishments, and movie theaters that we analyze in this paper. Variable names indicate the business type and the associated capacity limit, with “>50%” indicating a capacity limit over 50% (including 100% or full capacity). *Total* includes the entire database, before imposing filters. *Baseline Data* is all available county data beginning 6 weeks after the first recorded fatality. *Low Population* is the baseline data after the 5 most populous counties in each state have been dropped. *Neighbor 100* is the baseline data using only counties that are not on the state border and for which a matching non-border county within 100 in another state exists. *Neighbor 200* is the same as *Neighbor 100*, but the matching distance is extended to 200 miles. The percentages in each cell indicate the percent of observations in the sample where we observe the policy.
