# Supplementary material for: All or nothing? Partial business shutdowns and COVID-19 fatality growth
Source: PubMed Central journal article supplement (PMC8827474; doi:10.1371/journal.pone.0262925), 2022-02-09
Supplement: pone.0262925.s003.pdf [file pone.0262925.s003.pdf]

**S2 Table. Distributions of Policy Duration and Fatality Growth Rate.**

| Panel A: Policy Duration           |        |        |        |        |        |        |
|------------------------------------|--------|--------|--------|--------|--------|--------|
|                                    | 5%     | 25%    | Median | 75%    | 95%    | Mean   |
| Bars Closed, Rest Closed           | 2.714  | 5.571  | 9.000  | 11.000 | 12.286 | 8.148  |
| Bars Closed, Rest Out              | 0.286  | 0.857  | 2.857  | 6.000  | 11.993 | 4.025  |
| Bars Closed, Rest 25%              | 0.571  | 1.000  | 2.000  | 4.857  | 17.143 | 4.110  |
| Bars Closed, Rest 50%              | 0.143  | 0.714  | 3.571  | 11.429 | 19.714 | 6.179  |
| Bars Closed, Rest >50%             | 0.286  | 0.857  | 3.429  | 15.714 | 26.714 | 7.791  |
| Bars Out, Rest Out                 | 0.571  | 1.143  | 2.571  | 4.000  | 9.857  | 3.753  |
| Bars Out, Rest 25%                 | 0.143  | 0.250  | 0.571  | 6.321  | 17.714 | 4.452  |
| Bars Out, Rest 50%                 | 0.286  | 0.571  | 0.714  | 5.000  | 5.286  | 2.361  |
| Bars Out, Rest >50%                | 0.657  | 1.000  | 1.000  | 1.857  | 3.571  | 1.686  |
| Bars 25%, Rest 50%                 | 0.714  | 0.714  | 3.000  | 9.571  | 15.314 | 4.971  |
| Bars 25%, Rest 25%                 | 0.714  | 0.714  | 2.143  | 12.714 | 15.286 | 6.595  |
| Bars 25%, Rest >50%                | 0.714  | 0.714  | 0.714  | 7.000  | 9.714  | 3.311  |
| Bars 50%, Rest 50%                 | 0.286  | 2.286  | 5.714  | 18.714 | 30.571 | 10.769 |
| Bars 50%, Rest >50%                | 0.286  | 1.429  | 7.143  | 15.143 | 30.286 | 10.117 |
| Bars >50%, Rest >50%               | 19.229 | 27.143 | 54.571 | 57.429 | 66.571 | 45.406 |
| Gyms Closed                        | 2.857  | 5.714  | 8.571  | 13.857 | 24.429 | 10.695 |
| Gyms 25%                           | 0.714  | 3.000  | 10.857 | 23.429 | 34.286 | 13.603 |
| Gyms 50%                           | 2.143  | 14.000 | 18.143 | 25.857 | 32.286 | 18.100 |
| Gyms >50%                          | 14.857 | 27.143 | 52.000 | 61.429 | 69.429 | 45.368 |
| Spas Closed                        | 3.386  | 8.286  | 10.571 | 13.143 | 27.143 | 11.714 |
| Spas 25%                           | 0.714  | 5.714  | 6.143  | 27.286 | 35.286 | 13.130 |
| Spas 50%                           | 4.314  | 16.000 | 27.714 | 31.714 | 32.571 | 23.666 |
| Spas >50%                          | 15.429 | 27.429 | 57.429 | 65.429 | 71.429 | 52.119 |
| Retail Closed                      | 6.286  | 8.286  | 9.714  | 10.857 | 40.000 | 12.471 |
| Retail 25%                         | 2.000  | 5.000  | 17.286 | 33.286 | 39.000 | 19.319 |
| Retail 50%                         | 1.714  | 5.000  | 18.357 | 32.000 | 34.714 | 18.611 |
| Retail >50%                        | 3.729  | 21.429 | 56.286 | 61.143 | 86.857 | 45.928 |
| Movies Closed                      | 1.000  | 5.714  | 10.571 | 14.000 | 40.000 | 12.768 |
| Movies 25%                         | 1.286  | 3.429  | 5.429  | 23.429 | 31.714 | 12.395 |
| Movies 50%                         | 1.000  | 5.000  | 19.000 | 29.000 | 32.286 | 17.373 |
| Movies >50%                        | 1.714  | 9.143  | 27.143 | 56.571 | 66.000 | 30.544 |
| Panel B: Fatality Growth Rate in % |        |        |        |        |        |        |
| Baseline Data                      | 0.000  | 0.000  | 2.097  | 9.531  | 33.647 | 7.844  |
| Low Population                     | 0.000  | 0.000  | 1.563  | 9.820  | 36.772 | 7.997  |
| Neighbor 100                       | 0.000  | 0.000  | 1.942  | 9.309  | 33.647 | 7.564  |
| Neighbor 200                       | 0.000  | 0.000  | 2.151  | 9.798  | 34.831 | 7.946  |

Panel A displays the number of weeks restrictions are left in place across dates and counties in the Baseline database. Column headers indicate percentiles. Panel B displays the distribution for the growth in the fatality rate for the four samples that we analyze. The fatality growth rate is the dependent variable in all regressions.
