# Supplementary material for: All or nothing? Partial business shutdowns and COVID-19 fatality growth
Source: PubMed Central journal article supplement (PMC8827474; doi:10.1371/journal.pone.0262925), 2022-02-09
Supplement: pone.0262925.s004.pdf [file pone.0262925.s004.pdf]

**S3 Table. Coefficient Significance Tests Against Bars and Restaurants Closed.**

|                        | Baseline Data |          |
|------------------------|---------------|----------|
|                        | t+4           | t+6      |
| Bars Closed, Rest Out  | 0.394         | 0.603    |
| Bars Out, Rest Out     | 0.004***      | 0.135    |
| Bars Closed, Rest 25%  | 0.686         | 0.174    |
| Bars Out, Rest 25%     | 0.166         | 0.293    |
| Bars 25%, Rest 25%     | 0.083*        | 0.036**  |
| Bars Closed, Rest 50%  | 0.092*        | 0.046**  |
| Bars Out, Rest 50%     | 0.000***      | 0.015**  |
| Bars 25%, Rest 50%     | 0.218         | 0.005*** |
| Bars 50%, Rest 50%     | 0.468         | 0.046**  |
| Bars Closed, Rest >50% | 0.001***      | 0.541    |
| Bars 25%, Rest >50%    | 0.000***      | 0.024**  |
| Bars 50%, Rest >50%    | 0.665         | 0.203    |

This table reports F-tests for the hypothesis that the coefficient values reported in the Baseline Data regressions in Table 2 equal the coefficient values for the full closure policy *Bars Closed, Restaurants Closed*. The values in the table are p-values. \*\*\* indicates significance at the 1% level; \*\* indicates significance at 5% = \*\*; \* indicates significance at 10%.
