# Supplementary material for: All or nothing? Partial business shutdowns and COVID-19 fatality growth
Source: PubMed Central journal article supplement (PMC8827474; doi:10.1371/journal.pone.0262925), 2022-02-09
Supplement: pone.0262925.s005.pdf [file pone.0262925.s005.pdf]

**S4 Table. Pre-trends analysis: Residual Fatality Growth near Policy Introductions.**

|                         | Week $t-2$ |            | Week $t-1$ |            | Week $t$  |            | Week $t+1$ |            | Week $t+2$ |            |
|-------------------------|------------|------------|------------|------------|-----------|------------|------------|------------|------------|------------|
|                         | Mean       | $p$ -value | Mean       | $p$ -value | Mean      | $p$ -value | Mean       | $p$ -value | Mean       | $p$ -value |
| Bars Closed, Rest Close | -0.689     | 1.016      | 2.081**    | 1.013      | 1.118     | 0.944      | 0.564      | 0.802      | 0.588      | 0.924      |
| Bars Closed, Rest Out   | 2.716***   | 0.899      | 3.959***   | 0.946      | 2.204***  | 0.694      | 2.839***   | 0.738      | 1.471**    | 0.597      |
| Bars Out, Rest Out      | 1.156      | 0.941      | 1.808**    | 0.759      | 2.946***  | 0.800      | 0.719      | 0.628      | 0.202      | 0.536      |
| Bars Closed, Rest 25%   | 0.741      | 1.341      | -1.964**   | 0.801      | 0.052     | 0.857      | 2.697**    | 1.256      | -0.172     | 0.708      |
| Bars Out, Rest 25%      | -2.043**   | 0.928      | -0.349     | 1.950      | 3.635     | 3.096      | -2.684*    | 1.348      | -1.994     | 1.294      |
| Bars 25%, Rest 25%      | 1.203      | 1.043      | -0.670     | 0.845      | 2.191**   | 0.921      | 3.589***   | 1.034      | 4.479***   | 1.000      |
| Bars Closed, Rest 50%   | -0.448     | 0.573      | -0.213     | 0.442      | -0.500    | 0.466      | 0.509      | 0.507      | 1.489***   | 0.488      |
| Bars Out, Rest 50%      | 0.774      | 0.742      | 1.808***   | 0.688      | 0.983     | 0.751      | -0.724     | 0.608      | -0.796     | 0.537      |
| Bars 25%, Rest 50%      | -1.192**   | 0.504      | 0.119      | 0.638      | -1.748*** | 0.453      | -1.518***  | 0.584      | -1.046*    | 0.560      |
| Bars 50%, Rest 50%      | -0.565     | 0.498      | -1.326***  | 0.370      | -1.239*** | 0.380      | -0.720*    | 0.372      | -0.585     | 0.376      |
| Bars Closed, Rest >50%  | -2.226***  | 0.525      | -1.699***  | 0.563      | -1.116**  | 0.560      | -0.577     | 0.657      | 0.349      | 0.838      |
| Bars 25%, Rest >50%     | 2.232*     | 1.235      | -0.044     | 1.023      | 4.546***  | 1.243      | 5.681***   | 1.313      | 8.379***   | 1.509      |
| Bars 50%, Rest >50%     | -0.698     | 0.494      | -1.602***  | 0.435      | -0.967**  | 0.445      | -0.654     | 0.507      | -1.964***  | 0.412      |
| Gyms Closed             | 2.426***   | 0.878      | 3.486***   | 0.834      | 3.848***  | 0.828      | 3.636***   | 0.766      | 3.687***   | 0.791      |
| Gyms 25%                | 1.222*     | 0.724      | 0.653      | 0.671      | 1.251**   | 0.626      | 2.740***   | 0.746      | 2.369***   | 0.667      |
| Gyms 50%                | -0.428     | 0.393      | 0.013      | 0.392      | -0.898**  | 0.393      | -1.724***  | 0.303      | -0.934**   | 0.368      |
| Spas Closed             | 1.173      | 1.666      | 4.367***   | 1.583      | 5.547***  | 1.528      | 5.162***   | 1.556      | 3.947**    | 1.746      |
| Spas 25%                | 3.336***   | 0.870      | 2.618***   | 0.793      | 4.098***  | 0.786      | 4.702***   | 0.865      | 5.346***   | 0.851      |
| Spas 50%                | -0.380     | 0.479      | -0.494     | 0.474      | -1.587*** | 0.476      | -0.840*    | 0.434      | 0.203      | 0.490      |
| Retail Closed           | -2.560*    | 1.270      | 4.161      | 3.911      | -3.006*   | 1.694      | -0.988     | 1.722      | -5.175***  | 1.381      |

|               |          |       |          |       |           |       |          |       |         |       |
|---------------|----------|-------|----------|-------|-----------|-------|----------|-------|---------|-------|
| Retail 25%    | -1.601*  | 0.856 | -0.750   | 0.901 | -1.230*   | 0.673 | -0.075   | 0.828 | 0.225   | 0.977 |
| Retail 50%    | 1.435*** | 0.522 | 3.229*** | 0.543 | 2.066***  | 0.481 | 0.279    | 0.432 | -0.565  | 0.371 |
| Movies Closed | 1.315**  | 0.599 | 1.908*** | 0.576 | 1.348**   | 0.525 | 1.323*** | 0.461 | 1.138** | 0.452 |
| Movies 25%    | -0.439   | 0.631 | 0.758    | 0.696 | -1.315*** | 0.430 | 1.555**  | 0.664 | 1.538** | 0.687 |
| Movies 50%    | 0.373    | 0.355 | 0.663**  | 0.323 | -0.752*** | 0.270 | -1.109** | 0.455 | 0.373   | 0.513 |

This table calculates residuals from a regression of week-ahead change in deaths ( $\text{Growth}(t+1)$ ) during weeks  $t+j$ , where  $j = -2$  through  $+2$  relative to the introduction of policy  $i$ . Control variables are: current cumulative deaths in the county, lagged changes in deaths per capita, time controls, weather information, and demographic data are included in the regression. We also include all policies that are already in place as of period  $t$  from Table 2 other than the newly implemented policy  $i$ , where policy  $i$  is the policy listed in the first column.  $\text{Mean}_{t+i}$  denotes the week  $t+j$  average change fatality growth times 100. \*\*\* denotes significance at the 1% level; \*\* denotes 5% significance; \* denotes 10% significance.
