# Supplementary material for: All or nothing? Partial business shutdowns and COVID-19 fatality growth
Source: PubMed Central journal article supplement (PMC8827474; doi:10.1371/journal.pone.0262925), 2022-02-09
Supplement: pone.0262925.s006.pdf [file pone.0262925.s006.pdf]

**S5 Table. Baseline Forecast Regressions 4 and 6 Weeks Ahead, without the Lagged Dependent Variable.**

| VARIABLES                | Mean <sub>t+4</sub> | S.E.  | Mean <sub>t+6</sub> | S.E.  |
|--------------------------|---------------------|-------|---------------------|-------|
| Bars Closed, Rest Closed | -1.108**            | 0.503 | -1.234***           | 0.464 |
| Bars Closed, Rest Out    | -0.406              | 0.468 | -1.709***           | 0.418 |
| Bars Out, Rest Out       | 0.401               | 0.515 | -0.793*             | 0.454 |
| Bars Closed, Rest 25%    | -0.598              | 0.526 | -0.330              | 0.526 |
| Bars Out, Rest 25%       | -4.291***           | 0.921 | -3.386***           | 0.930 |
| Bars 25%, Rest 25%       | -2.939***           | 0.504 | -3.389***           | 0.491 |
| Bars Closed, Rest 50%    | -0.848**            | 0.343 | -1.130***           | 0.324 |
| Bars Out, Rest 50%       | 1.145*              | 0.659 | -0.678              | 0.703 |
| Bars 25%, Rest 50%       | -0.639              | 0.503 | 0.205               | 0.495 |
| Bars 50%, Rest 50%       | -0.495*             | 0.264 | -0.274              | 0.238 |
| Bars Closed, Rest >50%   | 1.716***            | 0.471 | -0.375              | 0.357 |
| Bars 25%, Rest >50%      | 4.206***            | 0.768 | 2.381***            | 0.636 |
| Bars 50%, Rest >50%      | 0.059               | 0.294 | -0.102              | 0.274 |
| Gyms Closed              | -0.738*             | 0.410 | -1.223***           | 0.384 |
| Gyms 25%                 | 0.541               | 0.372 | 0.673*              | 0.359 |
| Gyms 50%                 | 0.247               | 0.282 | -0.288              | 0.268 |
| Spas Closed              | 2.506***            | 0.410 | 2.406***            | 0.406 |
| Spas 25%                 | 1.304***            | 0.406 | 0.798**             | 0.391 |
| Spas 50%                 | 1.200***            | 0.262 | 1.637***            | 0.254 |
| Retail Closed            | -0.494              | 0.533 | -1.272**            | 0.520 |
| Retail 25%               | -0.619**            | 0.263 | -0.205              | 0.248 |
| Retail 50%               | -0.721***           | 0.217 | -0.621***           | 0.198 |
| Movies Closed            | 0.265               | 0.379 | -0.174              | 0.348 |
| Movies 25%               | 1.154***            | 0.312 | 0.512*              | 0.286 |
| Movies 50%               | 0.860***            | 0.278 | 0.305               | 0.261 |
| Observations             | 66,321              |       | 66,321              |       |
| Adjusted R-squared       | 0.0823              |       | 0.0851              |       |

The table shows results of estimating Equation (1), where the dependent variable is the  $j$  week ahead (from date  $t$ ) fatality growth. The data and specification are identical to the regressions using the *Baseline Data* in Table 2 in the main paper, except remove the lagged fatality growth and lagged cumulative fatalities per capita variables from the specification. Each explanatory variable is a dummy variable equal to 1 if that policy is in place on date  $t$  and 0 otherwise. Capacity limits over 50% (including full openings) are the omitted policies. Demographic and weather controls are all included in the regressions, but estimated coefficients are not reported in the table. The *Baseline Data* include all counties. Standard errors are clustered at the county level. Significance Key: \* 10%; \*\* 5%; \*\*\* 1%.
